# Supplementary material for: Anomalous macromolecular assembly of partially fluorinated polyhedral oligomeric silsesquioxanes
Source: Royal Society of Chemistry journal article supplement (doi:10.1039/c2nj20922e), 2012-01-01
Supplement: c2nj20922e.pdf [file c2nj20922e.pdf]

## Supplementary Information

### Anomalous Macromolecular Assembly of Partially Fluorinated Polyhedral Oligomeric Silsesquioxanes

Sharon C. Kettwich,<sup>a</sup> Scott N. Pierson,<sup>a</sup> Andrew J. Peloquin,<sup>a</sup>  
Joseph M. Mabry<sup>b</sup> and Scott T. Iacono<sup>a,\*</sup>

<sup>a</sup>Department of Chemistry, United States Air Force Academy,  
2355 Fairchild Drive, USAF Academy, CO 80840, USA

<sup>b</sup> Air Force Research Laboratory, Propulsion Directorate,  
10 E. Saturn Boulevard, Edwards Air Force Base, CA 93524, USA

\*Correspondence e-mail: scott.iacono@usafa.edu

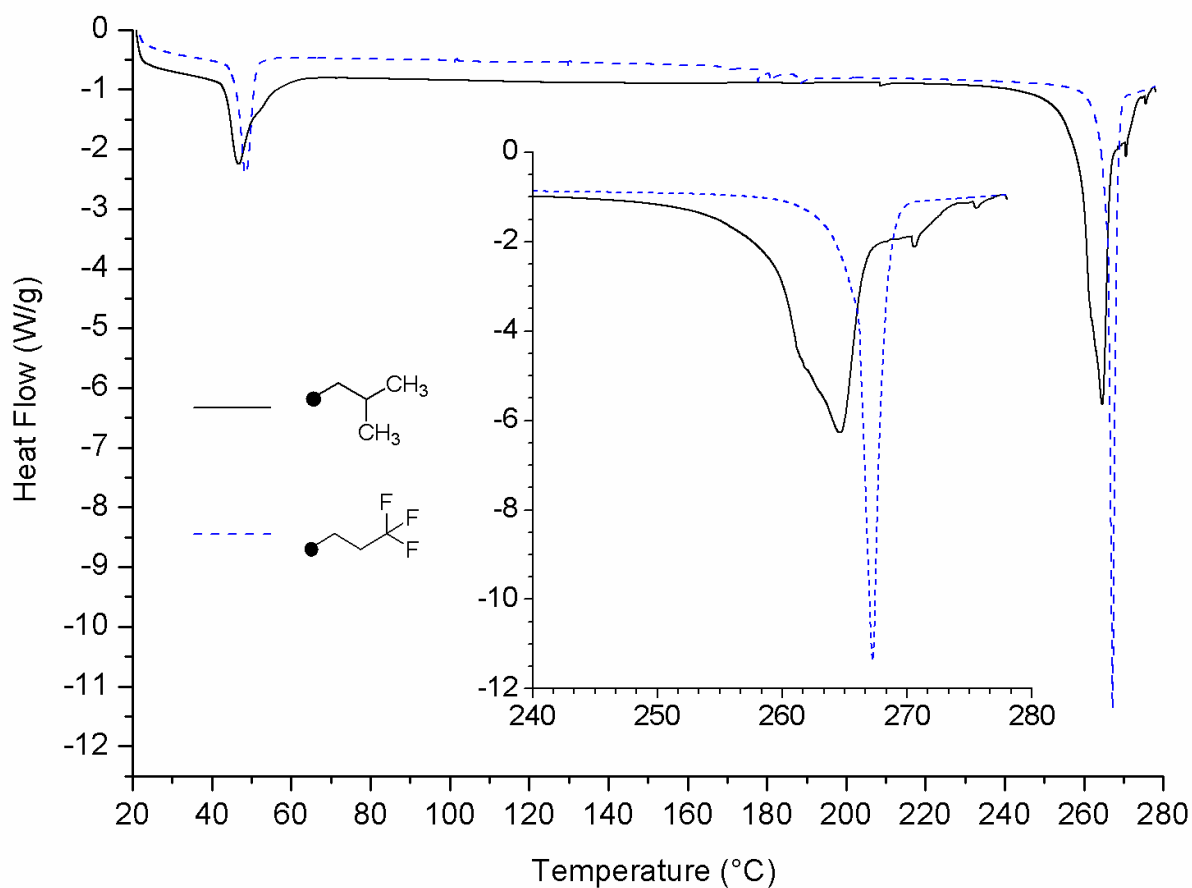

**Fig S1.** DSC of octaisopropyl POSS and F-POSS compound **2** at a scan rate of 5 °C/min.

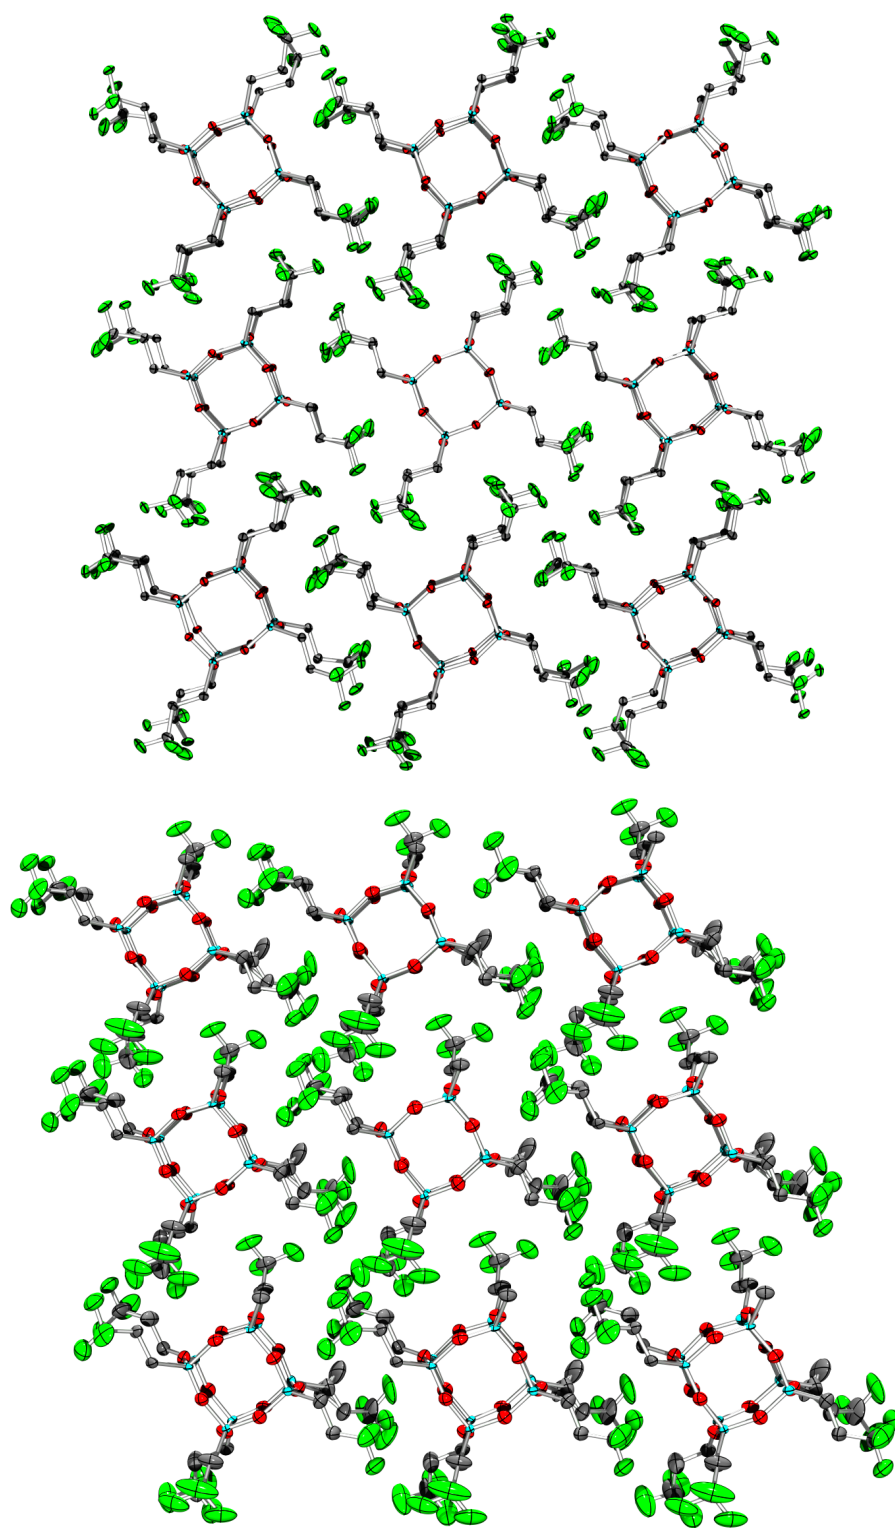

**Fig S2.** Packing diagram of F-POSS compounds **2** (top) and **8** (bottom) along the c-axis. Ellipsoids are shown at 30% probability. Hydrogen atoms and THF molecule are omitted for clarity.

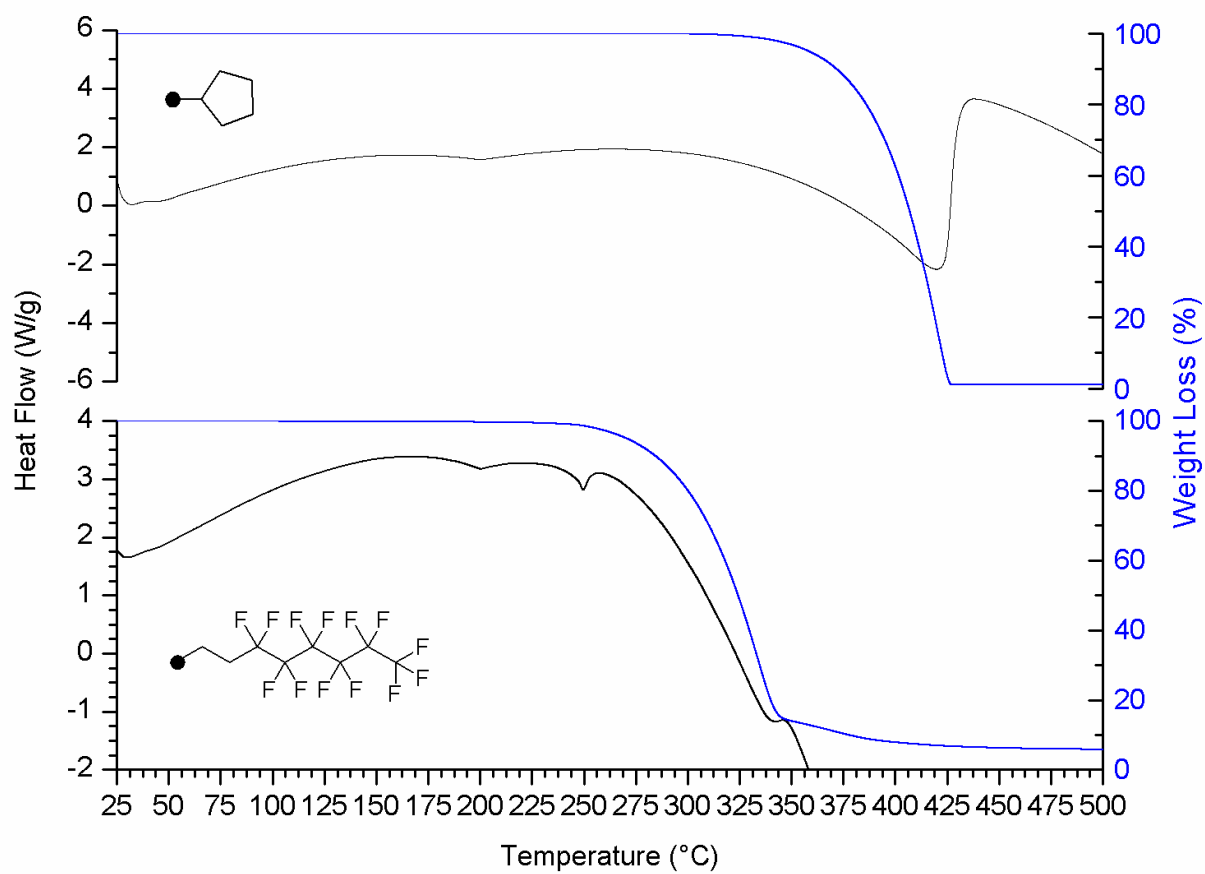

**Fig S3.** Simultaneous TGA/DSC comparison of octacycloptyl POSS with compound **12**.
